# Supplementary material
Source: PubMed Central journal article supplement (PMC3288967)
Supplement: NIHMS338709-supplement-supplement_1.pdf [file NIHMS338709-supplement-supplement_1.pdf]

## Supplementary Material:

Table S1. Sociodemographic Characteristics of Individuals with versus without CD in Men

|                                        | Men with CD<br>(N=969) |             | Men without CD (n=13595) |             | OR   | 95%<br>CI of OR |
|----------------------------------------|------------------------|-------------|--------------------------|-------------|------|-----------------|
|                                        | %                      | 95%<br>CI   | %                        | 95%<br>CI   |      |                 |
| Race/ethnicity                         |                        |             |                          |             |      |                 |
| White <sup>a</sup>                     | 70.87                  | 66.31-75.05 | 71.25                    | 67.92-74.37 |      |                 |
| Black                                  | 8.42                   | 6.57-10.74  | 10.20                    | 8.96-11.60  | 0.83 | 0.65-1.05       |
| Asian                                  | 2.78                   | 1.63-4.69   | 4.47                     | 3.38-5.88   | 0.62 | 0.36-1.07       |
| Native American                        | 5.41                   | 3.66-7.91   | 1.81                     | 1.48-2.21   | 3.00 | 1.96-4.59       |
| Hispanic                               | 12.52                  | 9.28-16.69  | 12.27                    | 10.02-14.93 | 1.03 | 0.80-1.32       |
| Nativity                               |                        |             |                          |             |      |                 |
| Born in the United States <sup>a</sup> | 91.93                  | 89.10-94.08 | 85.20                    | 82.09-87.85 |      |                 |
| Born in a different country            | 8.07                   | 5.92-10.90  | 14.80                    | 12.15-17.91 | 0.51 | 0.38-0.66       |
| Marital Status                         |                        |             |                          |             |      |                 |
| Married or cohabiting <sup>a</sup>     | 59.48                  | 55.33-63.49 | 68.01                    | 66.78-69.22 |      |                 |
| Widowed/separated/divorced             | 13.48                  | 11.20-16.14 | 12.74                    | 12.11-13.40 | 1.21 | 0.96-1.53       |
| Never married                          | 27.04                  | 23.45-30.96 | 19.25                    | 18.10-20.45 | 1.61 | 1.29-2.00       |
| Education Status                       |                        |             |                          |             |      |                 |
| < High School                          | 20.33                  | 17.19-23.88 | 13.65                    | 12.68-14.68 | 1.54 | 1.24-1.92       |
| High School graduate                   | 19.03                  | 16.04-22.42 | 23.57                    | 22.38-24.81 | 0.84 | 0.68-1.03       |
| Some college or higher <sup>a</sup>    | 60.64                  | 56.70-64.44 | 62.78                    | 61.24-64.30 |      |                 |
| Urbanicity                             |                        |             |                          |             |      |                 |
| Urban <sup>a</sup>                     | 84.91                  | 81.70-87.65 | 83.89                    | 82.57-85.13 |      |                 |
| Rural                                  | 15.09                  | 12.35-18.30 | 16.11                    | 14.87-17.43 | 0.93 | 0.74-1.16       |
| Region                                 |                        |             |                          |             |      |                 |
| Northwest                              | 17.80                  | 14.48-21.68 | 17.65                    | 15.35-20.21 | 0.94 | 0.74-1.21       |
| Midwest                                | 16.40                  | 13.28-20.09 | 18.56                    | 16.40-20.94 | 0.83 | 0.64-1.07       |
|                                        | 38.97                  | 33.85-44.35 | 38.66                    | 35.61-41.80 | 0.94 | 0.76-1.17       |

|                      |       |             |       |             |      |           |
|----------------------|-------|-------------|-------|-------------|------|-----------|
| South                | 26.83 | 22.98-31.05 | 25.12 | 23.22-27.14 |      |           |
| West <sup>a</sup>    |       |             |       |             |      |           |
| Insurance            |       |             |       |             |      |           |
| Private <sup>a</sup> | 69.66 | 65.92-73.16 | 78.17 | 76.88-79.41 |      |           |
| Public               | 11.67 | 9.31-14.53  | 9.10  | 8.43-9.83   | 1.44 | 1.10-1.88 |
| None                 | 18.67 | 15.94-21.73 | 12.73 | 11.81-13.70 | 1.65 | 1.35-2.01 |

---

<sup>a</sup>Reference group

Table S 2. Sociodemographic Characteristics of Individuals with versus without CD in Women

|                                        | Women with CD<br>(n=509) |             | Women without CD<br>(n=19,580) |             | OR   | 95%<br>CI of OR |
|----------------------------------------|--------------------------|-------------|--------------------------------|-------------|------|-----------------|
|                                        | %                        | 95%<br>CI   | %                              | 95%<br>CI   |      |                 |
| Race/ethnicity                         |                          |             |                                |             |      |                 |
| White <sup>a</sup>                     | 66.51                    | 60.76-71.81 | 70.73                          | 67.49-73.77 |      |                 |
| Black                                  | 15.95                    | 12.22-20.56 | 11.84                          | 10.50-13.33 | 1.43 | 1.06-1.94       |
| Asian                                  | 1.12                     | 0.44-2.82   | 4.28                           | 3.37-5.43   | 0.28 | 0.11-0.68       |
| Native American                        | 5.86                     | 3.42-9.86   | 2.22                           | 1.84-2.66   | 2.81 | 1.56-5.06       |
| Hispanic                               | 10.55                    | 7.93-13.90  | 10.93                          | 8.76-13.56  | 1.03 | 0.72-1.46       |
| Nativity                               |                          |             |                                |             |      |                 |
| Born in the United States <sup>a</sup> | 95.92                    | 93.65-97.40 | 86.32                          | 83.23-88.92 |      |                 |
| Born in a different country            | 4.08                     | 2.60-6.35   | 13.68                          | 11.08-16.77 | 0.27 | 0.17-0.42       |
| Marital Status                         |                          |             |                                |             |      |                 |
| Married or cohabiting <sup>a</sup>     | 50.65                    | 45.42-55.87 | 60.71                          | 59.51-61.89 |      |                 |
| Widowed/separated/divorced             | 24.18                    | 20.13-28.76 | 24.45                          | 23.65-25.28 | 1.19 | 0.92-1.53       |
| Never married                          | 25.17                    | 20.76-30.16 | 14.84                          | 13.91-15.81 | 2.03 | 1.57-2.63       |
| Education Status                       |                          |             |                                |             |      |                 |
| < High School                          | 22.78                    | 18.48-27.73 | 13.70                          | 12.65-14.83 | 1.79 | 1.33-2.39       |
| High School graduate                   | 19.70                    | 15.80-24.30 | 24.45                          | 23.53-25.39 | 0.87 | 0.66-1.14       |
| Some college or higher <sup>a</sup>    | 57.52                    | 52.33-62.54 | 61.85                          | 60.61-63.08 |      |                 |
| Urbanicity                             |                          |             |                                |             |      |                 |
| Urban <sup>a</sup>                     | 83.54                    | 79.00-87.26 | 83.44                          | 82.28-84.55 |      |                 |
| Rural                                  | 16.46                    | 12.74-21.00 | 16.56                          | 14.45-17.72 | 0.99 | 0.75-1.32       |
| Region                                 |                          |             |                                |             |      |                 |
| Northwest                              | 19.40                    | 15.02-24.69 | 17.84                          | 15.54-20.40 | 1.18 | 0.84-1.66       |
| Midwest                                | 20.11                    | 15.55-25.60 | 18.50                          | 16.35-20.87 | 1.18 | 0.84-1.66       |
| South                                  | 37.12                    | 31.05-43.61 | 38.25                          | 35.06-41.55 | 1.05 | 0.78-1.42       |
| West <sup>a</sup>                      | 23.37                    | 18.86-28.58 | 25.40                          | 23.50-27.40 |      |                 |
| Insurance                              |                          |             |                                |             |      |                 |
| Private <sup>a</sup>                   | 63.90                    | 58.25-69.19 | 77.59                          | 76.19-78.94 |      |                 |
| Public                                 | 20.40                    | 16.77-24.58 | 12.18                          | 11.29-13.12 | 2.03 | 1.55-2.66       |
| None                                   | 15.71                    | 11.95-20.36 | 10.23                          | 9.42-11.10  | 1.86 | 1.32-2.63       |

<sup>a</sup>Reference group

Table S3. Number of CD symptoms and risk of psychiatry disorders among Men and Women

|                                  | Men (n=14564) |            |             |             | Women (n=20089) |           |             |             |
|----------------------------------|---------------|------------|-------------|-------------|-----------------|-----------|-------------|-------------|
|                                  | 1-2 (n=3079)  |            | 3 + (n=969) |             | 1-2 (n=2746)    |           | 3 + (n=509) |             |
|                                  | 95%           |            | 95%         |             | 95%             |           | 95%         |             |
|                                  | OR            | CI         | OR          | CI          | OR              | CI        | OR          | CI          |
| <b>Any Psychiatric Diagnoses</b> | 3.49          | 3.07,3.97  | 14.60       | 10.42-20.46 | 3.88            | 3.39-4.44 | 17.58       | 10.00-30.92 |
| <b>Any Axis I Disorder</b>       | 3.24          | 2.85-3.67  | 10.88       | 8.18-14.47  | 3.61            | 3.18-4.10 | 15.20       | 9.37-24.68  |
| Any Substance Disorder           | 2.67          | 2.38-3.00  | 6.32        | 5.17-7.73   | 3.47            | 3.14-3.84 | 10.85       | 8.22-14.32  |
| Nicotine Dependence              | 1.90          | 1.70-2.12  | 4.08        | 3.44-4.84   | 2.85            | 2.57-3.17 | 7.14        | 5.58-9.15   |
| Any Alcohol use Disorder         | 2.61          | 2.32-2.94  | 5.23        | 4.36-6.29   | 3.02            | 2.71-3.36 | 8.11        | 6.38-10.32  |
| Alcohol Abuse                    | 1.51          | 1.35-1.68  | 1.21        | 1.01-1.45   | 2.12            | 1.88-2.40 | 2.94        | 2.24-3.87   |
| Alcohol dependence               | 2.42          | 2.16-2.70  | 5.35        | 4.54-6.31   | 3.06            | 2.69-3.48 | 7.63        | 6.06-9.61   |
| Any Drug Use Disorder            | 3.07          | 2.70-3.50  | 8.39        | 6.97-10.09  | 4.41            | 3.80-5.12 | 15.28       | 12.00-19.44 |
| Drug Abuse                       | 2.81          | 2.44-3.23  | 6.72        | 5.51-8.18   | 4.10            | 3.49-4.80 | 9.80        | 7.60-12.64  |
| Drug Dependence                  | 3.36          | 2.87-4.72  | 13.67       | 10.64-17.57 | 5.39            | 4.19-6.92 | 30.36       | 22.60-40.79 |
| Any Mood Disorder                | 2.20          | 1.95-2.49  | 5.14        | 4.42-5.98   | 2.33            | 2.15-2.63 | 6.44        | 5.10-8.13   |
| Major Depressive Disorder        | 1.78          | 1.54-2.06  | 2.35        | 1.94-2.85   | 1.79            | 1.61-2.00 | 2.13        | 1.64-2.78   |
| Dysthymia                        | 2.06          | 1.55-2.74  | 3.23        | 2.19-4.76   | 1.85            | 1.47-2.34 | 3.07        | 2.07-4.55   |
| Bipolar Disorder                 | 2.63          | 2.17-3.19  | 7.98        | 6.48-9.83   | 2.81            | 2.38-3.31 | 8.54        | 6.71-10.87  |
| Any Anxiety Disorder             | 1.89          | 1.67-2.13  | 3.73        | 3.15-4.42   | 2.09            | 1.88-2.32 | 4.34        | 3.40-5.53   |
| Panic Disorder                   | 2.09          | 1.63-2.67  | 4.58        | 3.51-5.97   | 1.94            | 1.67-2.26 | 4.65        | 3.57-6.06   |
| Social Anxiety Disorder          | 1.86          | 1.54-2.25  | 4.11        | 3.25-5.21   | 2.44            | 2.10-2.83 | 3.72        | 2.83-4.89   |
| Specific Phobia                  | 1.68          | 1.45-1.95  | 3.00        | 2.40-3.76   | 1.84            | 1.65-2.06 | 3.36        | 2.63-4.28   |
| Generalized Anxiety Disorder     | 1.84          | 1.49-2.27  | 3.46        | 2.57-4.66   | 1.97            | 1.70-2.28 | 4.41        | 3.43-5.67   |
| Posttraumatic Stress Disorder    | 1.59          | 1.28-1.96  | 2.64        | 1.97-3.53   | 2.19            | 1.87-2.56 | 3.09        | 2.29-4.16   |
| Pathological Gambling            | 2.98          | 1.52-5.81  | 6.65        | 3.31-13.38  | 4.43            | 2.10-9.34 | 11.29       | 5.04-25.33  |
| Suicide Attempt                  | 2.82          | 2.04-3.91  | 7.55        | 5.27-10.81  | 3.32            | 2.76-3.99 | 9.01        | 6.65-12.21  |
| ADHD                             | 2.10          | 1.61-2.74  | 6.26        | 4.62-8.48   | 3.54            | 2.58-4.86 | 8.07        | 5.36-12.15  |
| <b>Any Axis II Disorder</b>      | 2.29          | 2.06-2.56  | 5.46        | 4.56-6.53   | 2.82            | 2.53-3.14 | 7.23        | 5.78-9.05   |
| Avoidant                         | 3.44          | 2.43-4.87  | 8.65        | 5.69-13.15  | 3.79            | 3.00-4.77 | 8.11        | 5.50-11.94  |
| Dependant                        | 4.86          | 2.00-11.78 | 28.71       | 12.65-65.14 | 3.88            | 2.24-6.72 | 16.62       | 9.08-30.43  |
| Obsessive-Compulsive             | 2.52          | 2.13-2.98  | 5.77        | 4.58-7.26   | 2.72            | 2.33-3.17 | 5.29        | 4.05-6.92   |
| Paranoid                         | 3.37          | 2.55-4.46  | 11.48       | 8.52-15.47  | 3.75            | 3.10-4.53 | 9.64        | 7.25-12.81  |
| Schizoid                         | 2.55          | 1.91-3.41  | 6.11        | 4.52-8.26   | 2.80            | 2.26-3.47 | 7.81        | 5.88-10.37  |

|              |      |           |       |            |      |           |       |            |
|--------------|------|-----------|-------|------------|------|-----------|-------|------------|
| Schizotypal  | 1.73 | 1.38-2.17 | 5.24  | 4.04-6.80  | 2.55 | 2.06-3.15 | 5.97  | 4.37-8.17  |
| Narcissistic | 1.53 | 1.30-1.79 | 2.92  | 2.30-3.70  | 1.84 | 1.51-2.23 | 4.74  | 3.53-6.35  |
| Borderline   | 1.94 | 1.60-2.36 | 4.59  | 3.57-5.91  | 3.04 | 2.60-3.55 | 6.53  | 5.06-8.44  |
| Histrionic   | 4.53 | 3.20-6.42 | 14.51 | 9.92-21.22 | 4.03 | 2.98-5.45 | 12.78 | 8.77-18.63 |

Abbreviations: CD= conduct disorder; ADHD= attention deficit hyperactive disorder

Reference group is 0 symptoms. Males endorsing 0 symptoms (n=10516). Women endorsing 0 symptoms (n=16834).

\*The cut point of groups (criterion=2) is 75% quantile in the whole sample with 1+ criteria.
